# Supplementary material for: Unveiling the potential of a BCN-biphenylene monolayer as a high-performance anode material for alkali metal ion batteries: a first-principles study
Source: Royal Society of Chemistry journal article supplement (doi:10.1039/d4nr01386g), 2024-01-01
Supplement: d4nr01386g1.pdf [file d4nr01386g1.pdf]

## Supplementary information

### Unveiling the potential of BCN-Biphenylene monolayer as a high-performance anode material for alkali metal ion batteries: A first-principles study

Ajay Kumar<sup>a</sup> and Prakash Parida<sup>a\*</sup>

<sup>a</sup> Department of Physics, Indian Institute of Technology Patna, Bihta, Bihar, India, 801106

\*Corresponding author: - pparida@iitp.ac.in

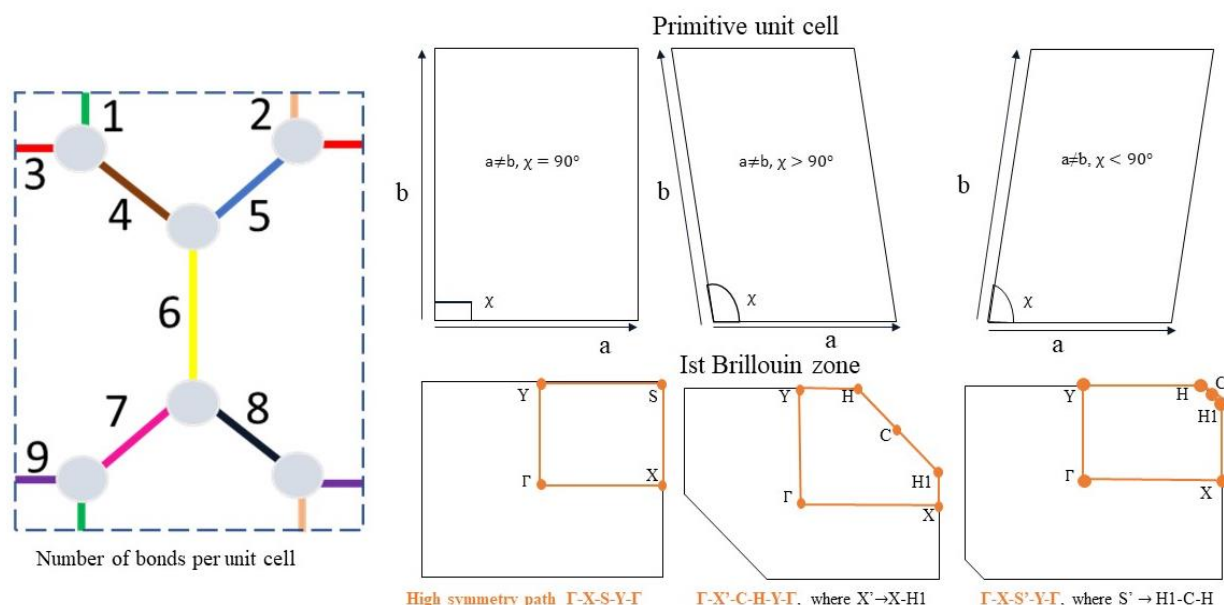

**Fig. S1** numbers of bonds per unit cell, primitive unit cell and their corresponding 1st Brillouin zone along with high symmetry path

**Table S1** lattice parameters, bond types, bond length and their count in different phases of CBN.

| Phases        | Lattice constant (Å) |      | angle | Types of Bonds and their counts per unit cell |         |   |         |   |         |   |         |   |         |   |         |  |
|---------------|----------------------|------|-------|-----------------------------------------------|---------|---|---------|---|---------|---|---------|---|---------|---|---------|--|
|               | a                    | b    |       | $a \neq b$                                    | B-B (Å) |   | C-C (Å) |   | N-N (Å) |   | C-N (Å) |   | B-N (Å) |   | B-C (Å) |  |
| x-CBN         |                      |      |       |                                               |         |   |         |   |         |   |         |   |         |   |         |  |
| $\alpha$ -BCN | 3.82                 | 4.85 | 90.0° | 1                                             | 1.68    | 1 | 1.38    | 1 | 1.42    | 2 | 1.43    | 2 | 1.43    | 2 | 1.52    |  |
| $\beta$ -BCN  | 3.87                 | 4.57 | 90.0° | 1                                             | 1.58    | 1 | 1.42    | 1 | 1.50    | 2 | 1.38    | 2 | 1.48    | 2 | 1.50    |  |
| $\gamma$ -BCN | 3.92                 | 4.46 | 90.0° | 1                                             | 1.60    | 1 | 1.45    | 1 | 1.42    | 2 | 1.38    | 2 | 1.43    | 2 | 1.53    |  |
| $\delta$ -BCN | 3.78                 | 4.86 | 91.4° | 1                                             | 1.66    | 0 | -       | 0 | -       | 4 | 1.40*   | 2 | 1.46    | 2 | 1.50    |  |
| $\eta$ -BCN   | 3.86                 | 4.55 | 92.5° | 0                                             | -       | 1 | 1.40    | 0 | -       | 2 | 1.38    | 4 | 1.48*   | 2 | 1.53    |  |
| $\theta$ -BCN | 3.90                 | 4.47 | 88.0° | 0                                             | -       | 0 | -       | 1 | 1.40    | 2 | 1.35    | 2 | 1.47    | 4 | 1.52*   |  |

Few bonds with different bond length are marks as \*, mention here, C-N(1.42 Å); B-N(1.47 Å); B-C(1.53 Å)

**Table S2** Min. and max. value of Young moduli and Poisson ratio of different phases of CBN.

| bpn-BCN       | Y( $\theta$ ) (N/m) |        | $\nu(\theta)$ |      |
|---------------|---------------------|--------|---------------|------|
|               | Min.                | Max.   | Min.          | Max. |
| $\alpha$ -BCN | 143.93              | 194.84 | 0.28          | 0.42 |
| $\beta$ -BCN  | 170.80              | 225.62 | 0.30          | 0.39 |
| $\gamma$ -BCN | 191.44              | 253.76 | 0.23          | 0.34 |

|               |        |        |      |      |
|---------------|--------|--------|------|------|
| $\delta$ -BCN | 143.94 | 203.64 | 0.29 | 0.45 |
| $\theta$ -BCN | 175.68 | 219.57 | 0.32 | 0.44 |
| $\eta$ -BCN   | 178.62 | 250.75 | 0.26 | 0.39 |

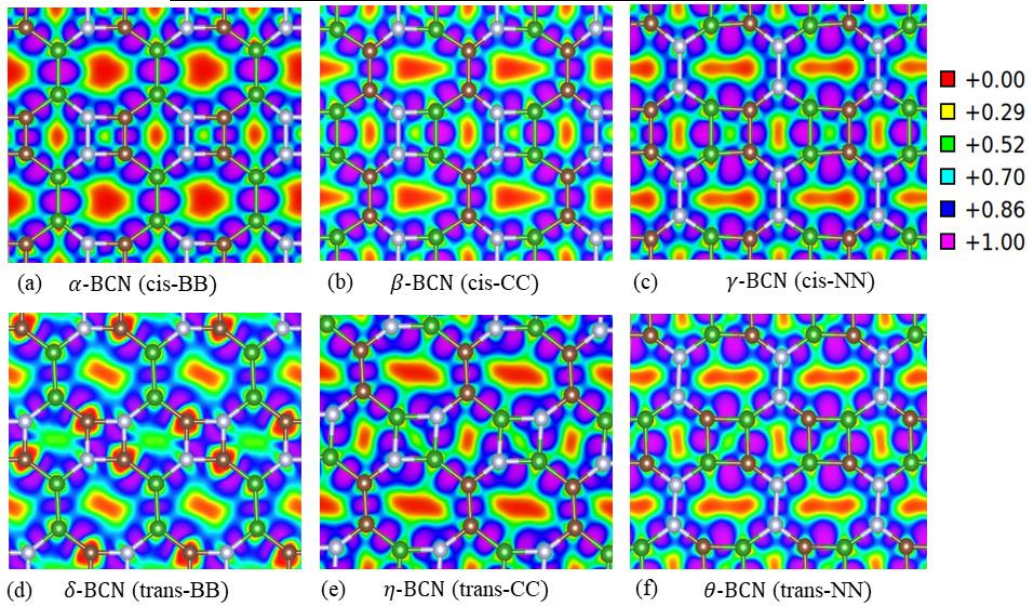

**Fig. S2** displays the electron localized function (ELF) of multiple phases of bpn-BCN monolayers with an iso-surface value of 0.4 atomic units.

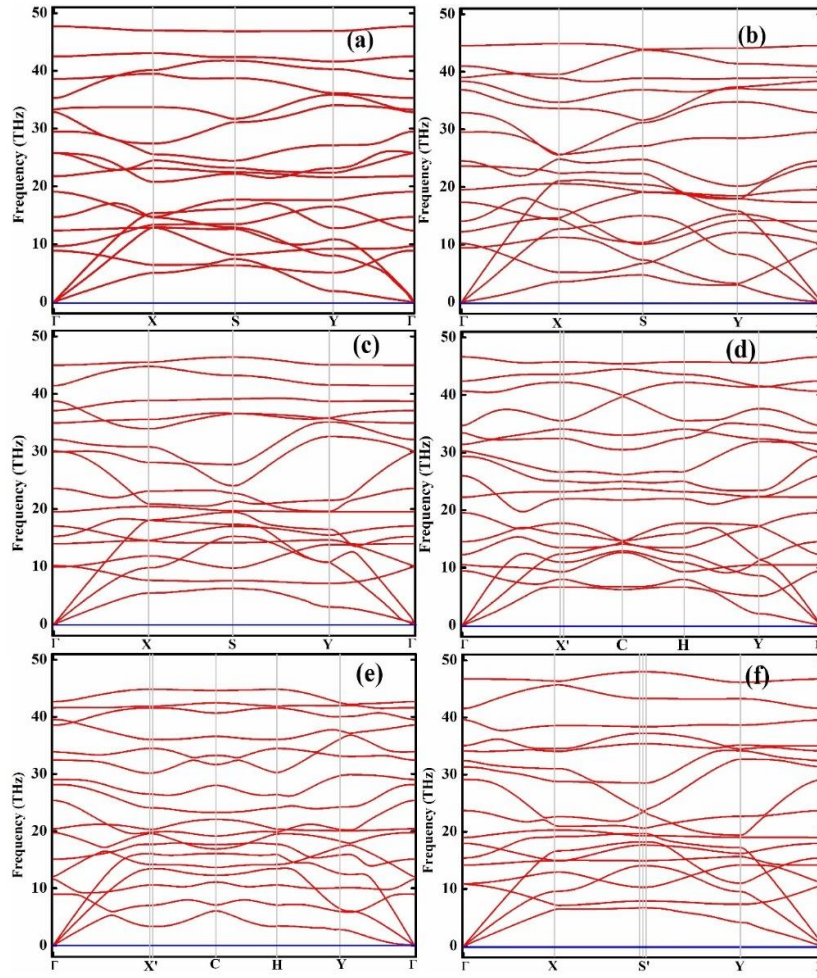

**Fig. S3** shows the phonon spectra of different phases of bpn-BCN monolayers;  $\alpha$ -BCN,  $\beta$ -BCN,  $\gamma$ -BCN,  $\delta$ -BCN,  $\eta$ -BCN and  $\theta$ -BCN are marked in the figure as 'a' to 'f' respectively.

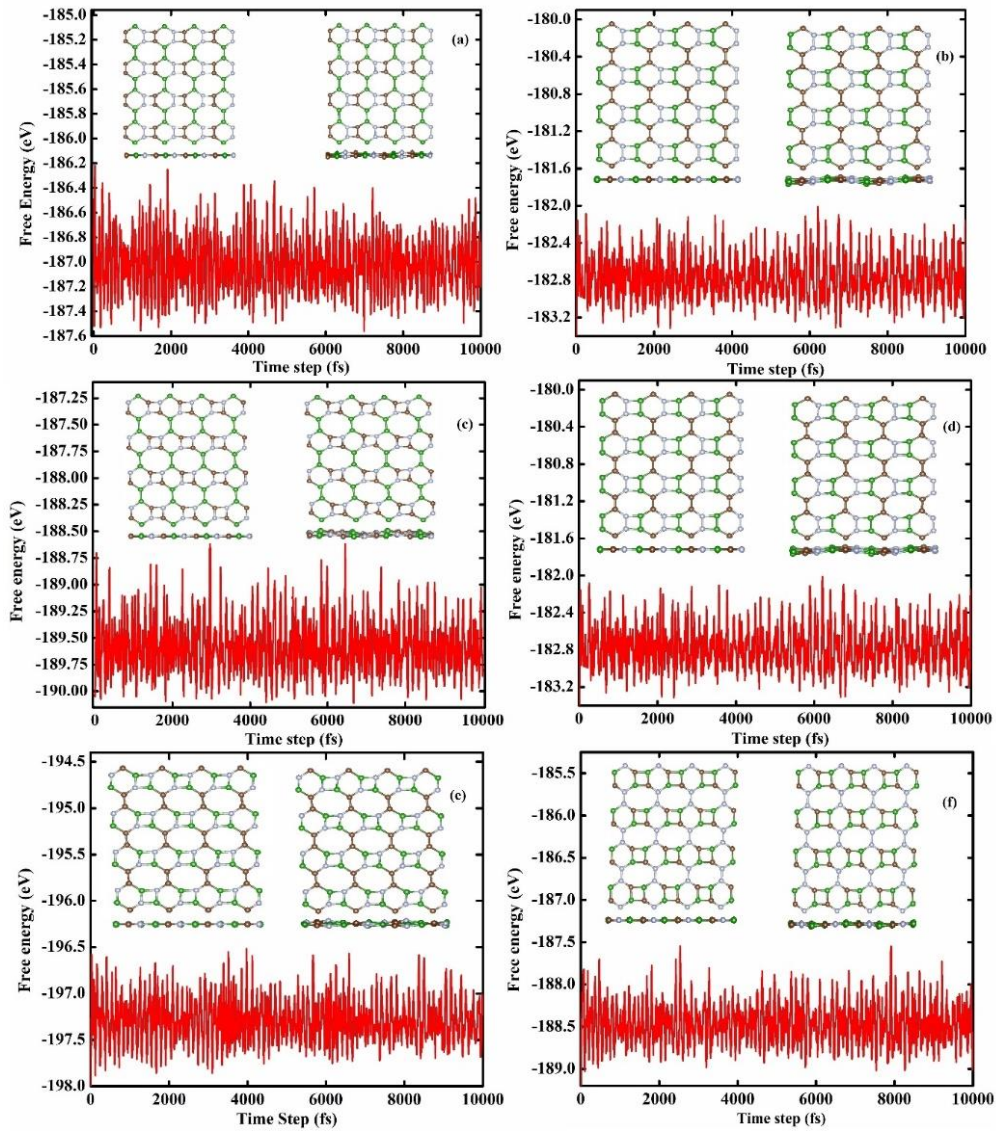

**Fig. S4** depicts *ab initio* molecular dynamics at 300K of different phases of bpn-BCN monolayers;  $\alpha$ -BCN,  $\beta$ -BCN,  $\gamma$ -BCN,  $\delta$ -BCN,  $\eta$ -BCN and  $\theta$ -BCN are marked in the figure as 'a' to 'f' respectively.

Note:- The energies of isolated single B, C, and N atoms, calculated by placing each atom in a cubic box with a box length of 20 Å, are follows:  $E_B = -69.59$  eV,  $E_C = -144.70$  eV, and  $E_N = -261.07$  eV. On the other hand, the  $\mu_C = -154.86$  eV is the energy of per carbon atom calculated from graphite, a stable carbon allotrope. In the N-rich environment, the energy per atom of the alpha-N<sub>2</sub> phase of solid nitrogen is  $\mu_N = -270.22$  eV, whereas for the B-rich environment, the energy per atom of a metallic alpha-B phase is  $\mu_B = -77.23$  eV.

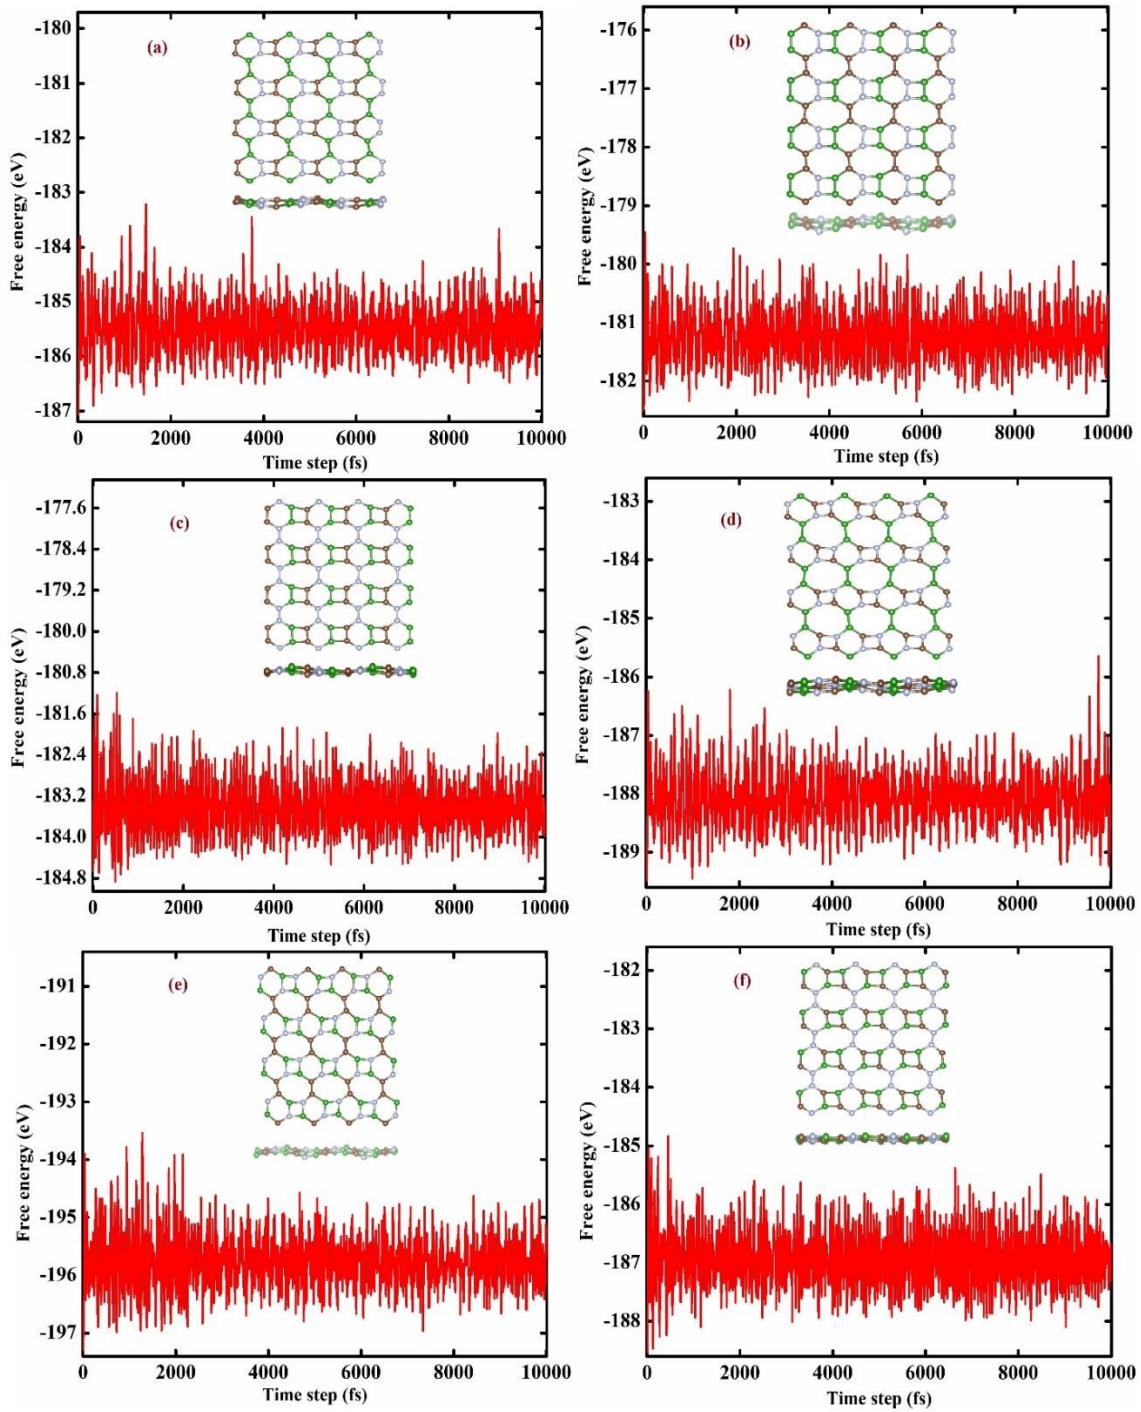

**Fig. S5** *ab initio* molecular dynamics at 800K, of different phases of bpn-BCN monolayer;  $\alpha$ -BCN,  $\beta$ -BCN,  $\gamma$ -BCN,  $\delta$ -BCN,  $\eta$ -BCN and  $\theta$ -BCN are marked in the figure as 'a' to 'f' respectively.

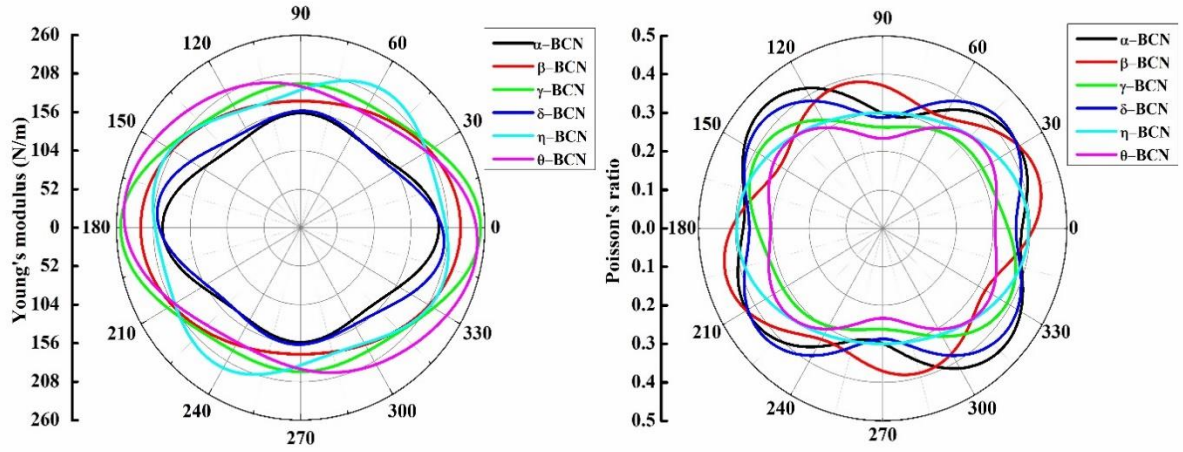

**Fig. S6** displays the angular dependence of Young's moduli (left panel)  $Y(\Phi)$  and Poisson's ratio (right panel)  $\nu(\Phi)$  of different phases of the bpn-BCN monolayers, where the angle  $\Phi$  is defined relative to the  $x$ -direction.

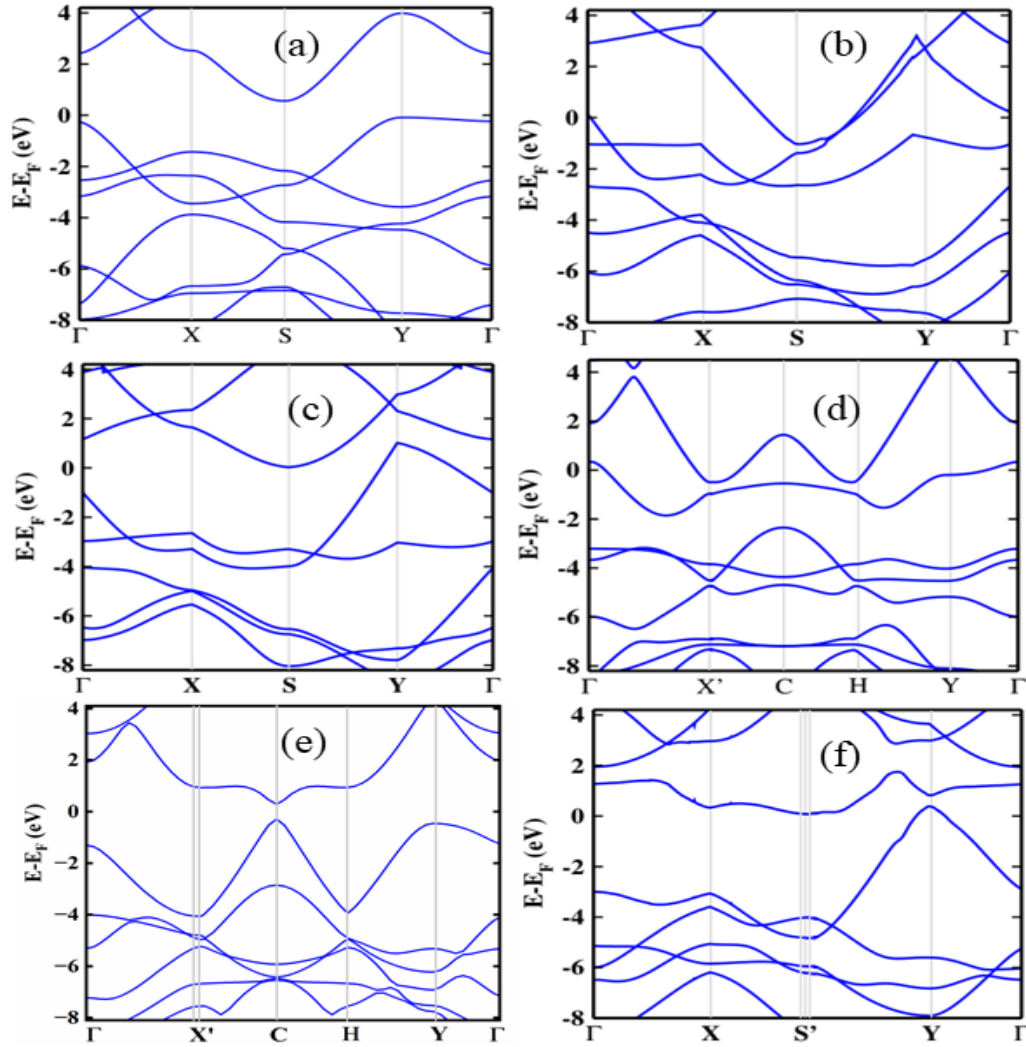

**Fig. S7** The electronic bands structures using HS06 hybrid exchange-correlation functional for different phases of bpn-BCN monolayer;  $\alpha$ -BCN,  $\beta$ -BCN,  $\gamma$ -BCN,  $\delta$ -BCN,  $\eta$ -BCN and  $\theta$ -BCN are marked in the figure as a, b, c, d, e and f respectively.

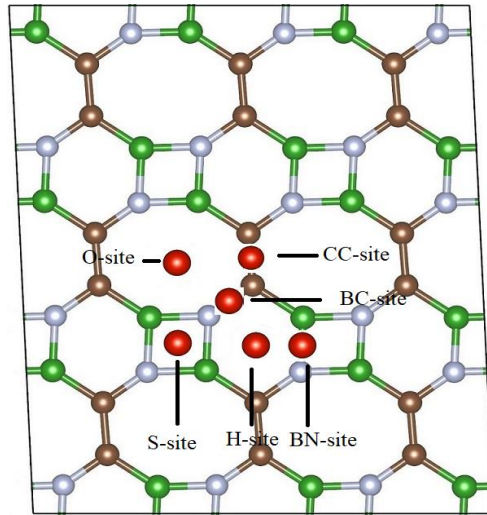

Fig. S8 All possible adsorption sites for alkali metal atoms in bpn-BCN monolayer..

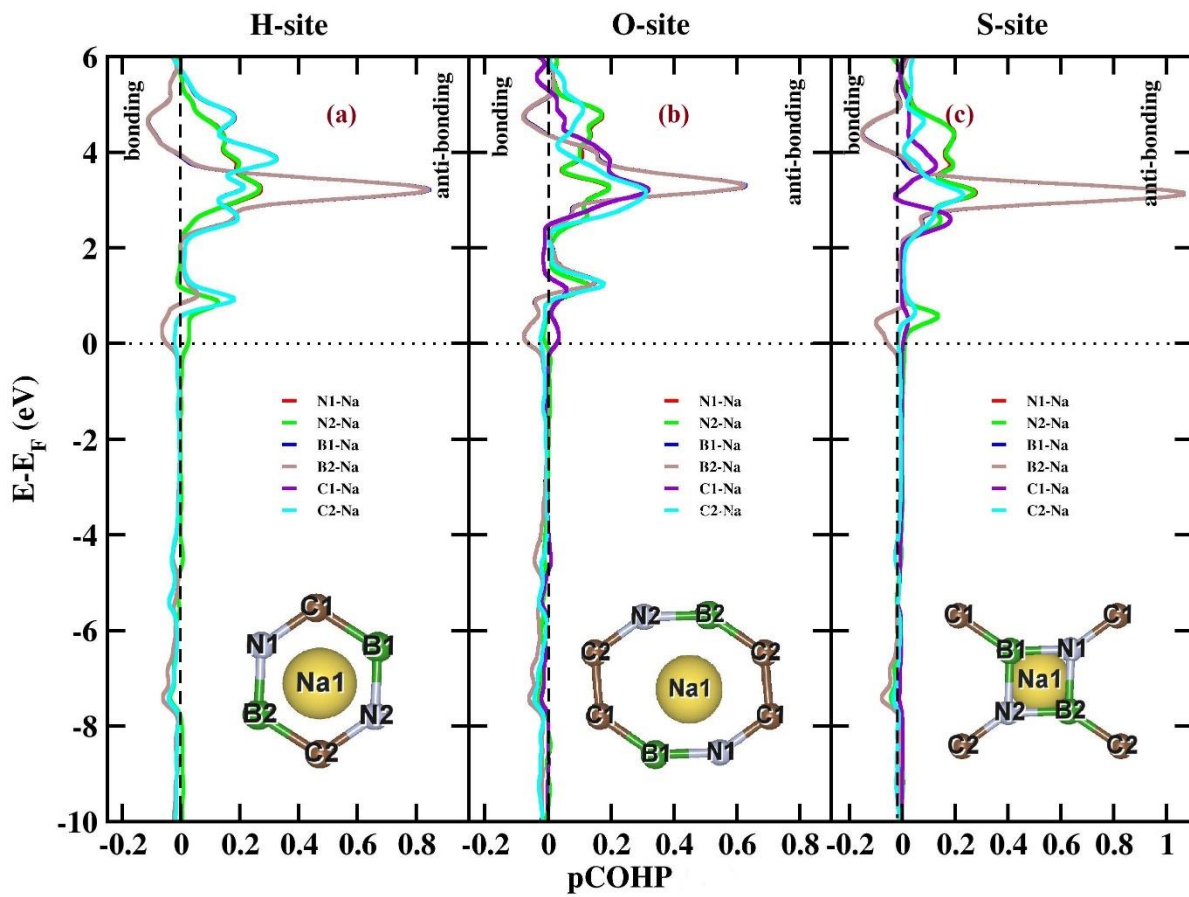

Fig. S9 pCOHP analyses of the chemical bonding between the adsorbed Na atom and constituent atoms of the bpn-BCN monolayer for (a) H-site, (b) O-site, and (c) S-site, respectively.

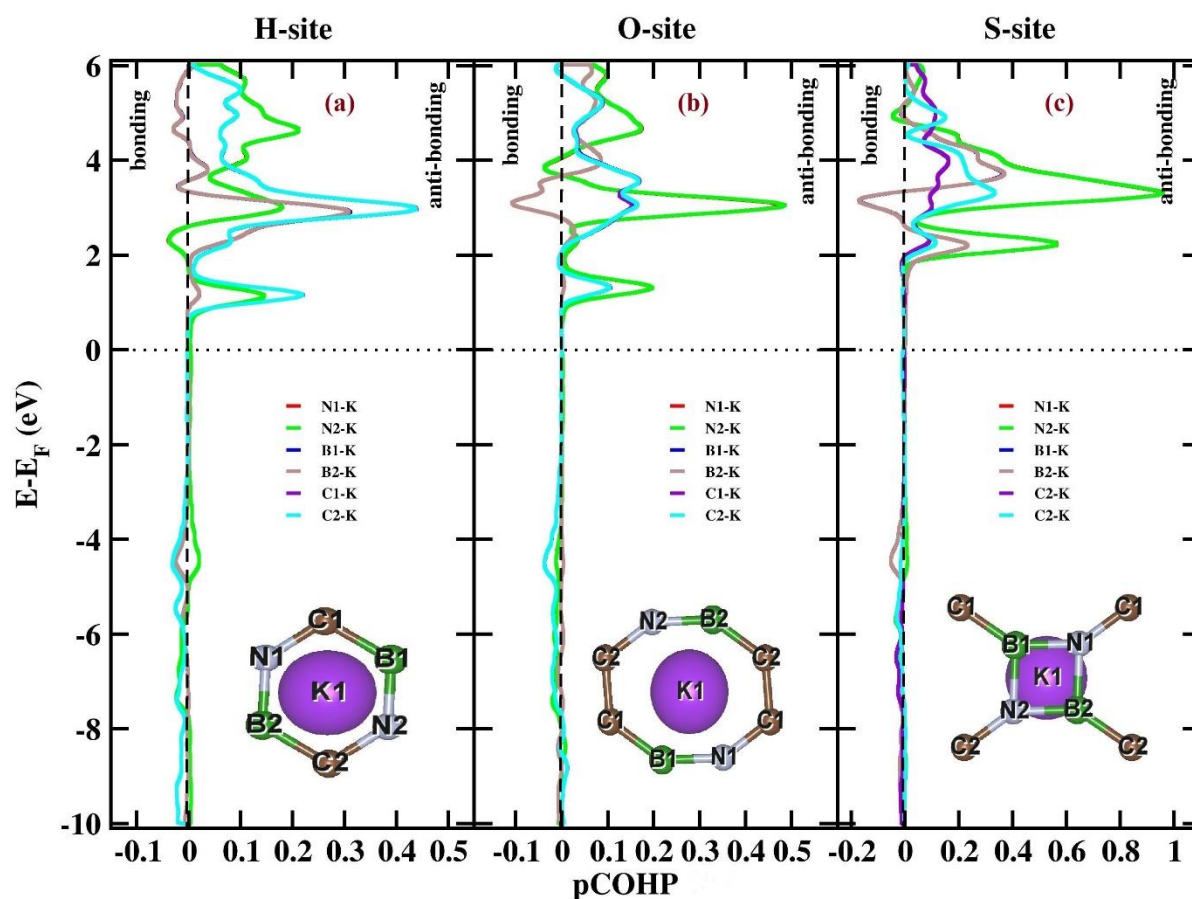

**Fig. S10** pCOHP analyses of the chemical bonding between the adsorbed K atom and constituent atoms of the bpn-BCN monolayer for (a) H-site, (b) O-site, and (c) S-site, respectively.

**Table S3** ICOHP (eV) values for BCN atoms with all alkali metals at different H-, O-, and S-sites. Please refer to Fig. 5, Fig. S9 and Fig. S10 for labels of B, C, and N atoms.

| X=Li,<br>Na, K | Li     |        |        | Na     |        |        | K      |        |        |
|----------------|--------|--------|--------|--------|--------|--------|--------|--------|--------|
|                | H-site | O-site | S-site | H-site | O-site | S-site | H-site | O-site | S-site |
| B1-X           | -0.175 | -0.171 | -0.179 | -0.431 | 0.313  | -0.452 | -0.284 | -0.161 | -0.442 |
| B2-X           | -0.187 | -0.171 | -0.179 | -0.434 | 0.311  | -0.431 | -0.281 | -0.157 | -0.446 |
| C1-X           | -0.225 | -0.218 | -0.089 | -0.531 | -0.391 | -0.220 | -0.646 | -0.346 | -0.383 |
| C2-X           | -0.223 | -0.217 | -0.097 | -0.533 | -0.388 | -0.224 | -0.649 | -0.345 | -0.372 |
| N1-X           | -0.211 | -0.179 | -0.200 | -0.428 | -0.410 | -0.436 | -0.463 | -0.508 | -1.053 |
| N2-X           | -0.208 | -0.178 | -0.200 | -0.431 | -0.408 | -0.431 | -0.461 | -0.513 | -1.055 |



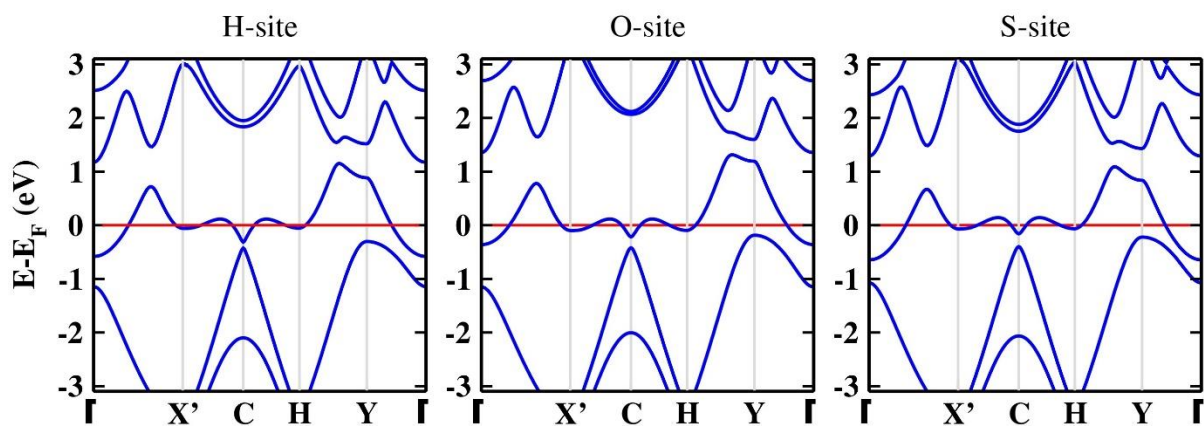

*Fig. S11* The electronic band spectra of Na metal absorbed bpn-BCN monolayer at H- O- and S-sites.

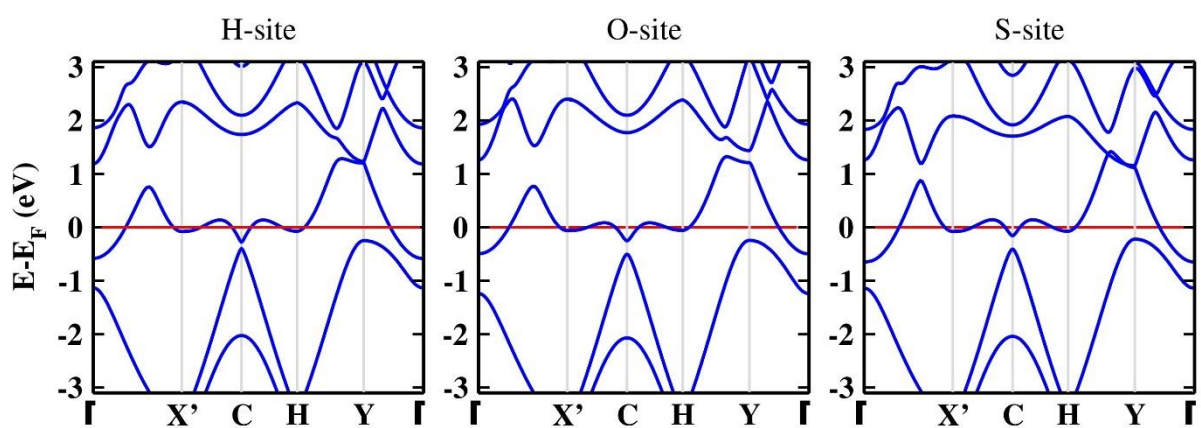

*Fig. S12* The electronic band spectra of K metal absorbed bpn-BCN monolayer at H- O- and S-sites.

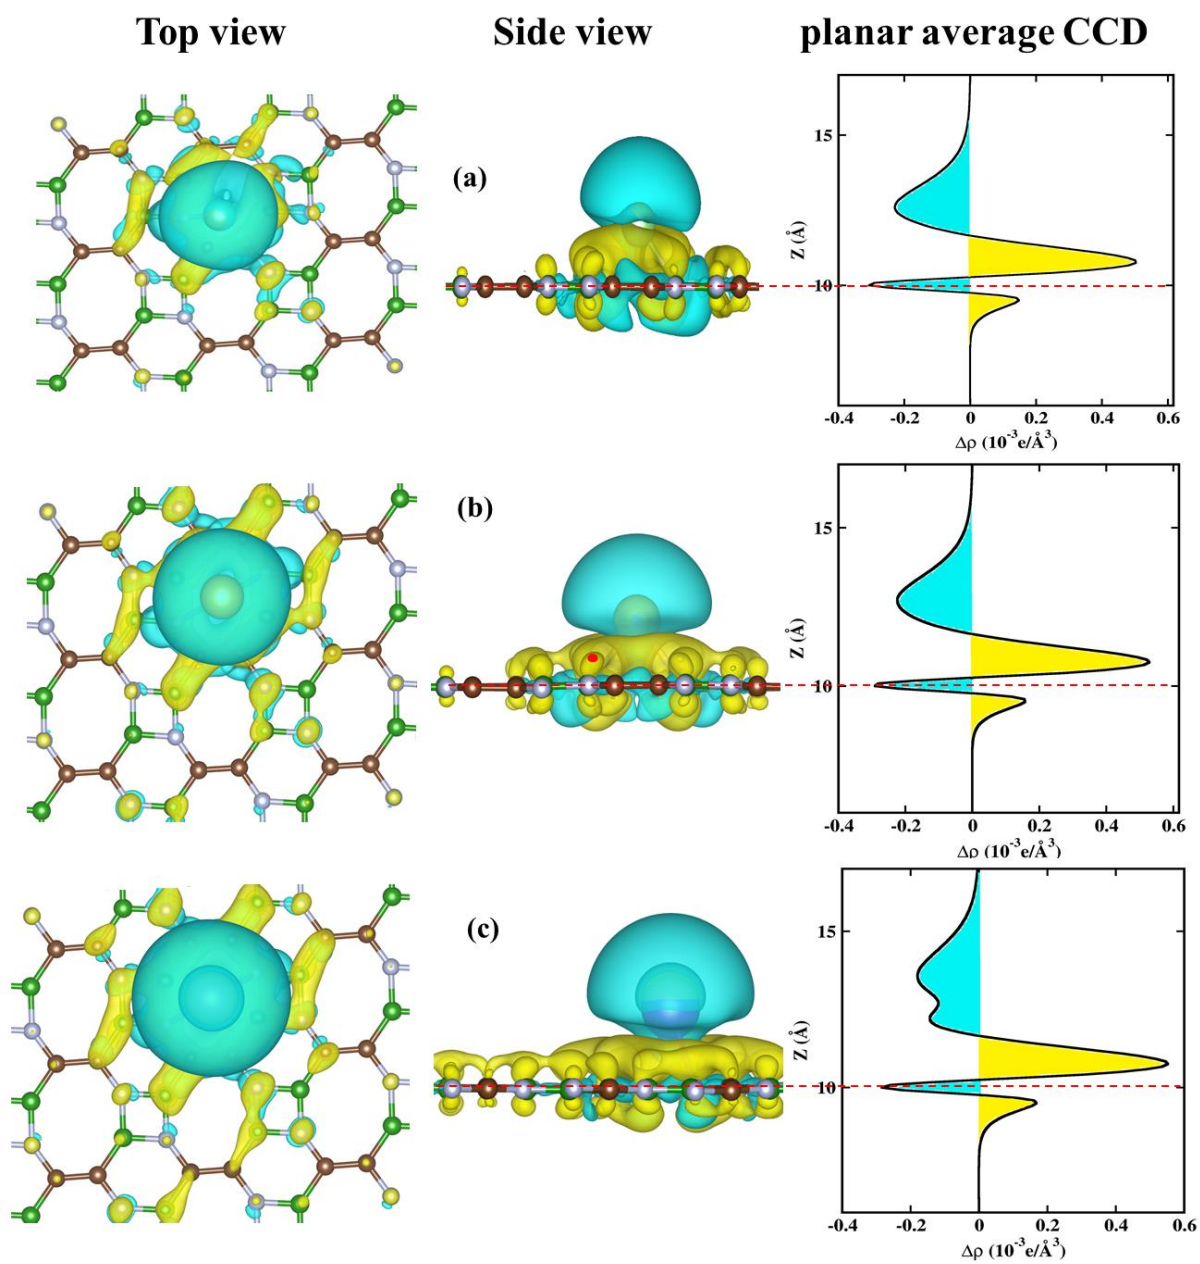

**Fig. S13** The top and side view along with average planar electron density difference for (a) Li- (b) Na- and K-metal adsorbed at (a) O-site on the bpn-BCN monolayer with iso-surface value of  $0.001 \text{ e}\text{\AA}^{-3}$ .

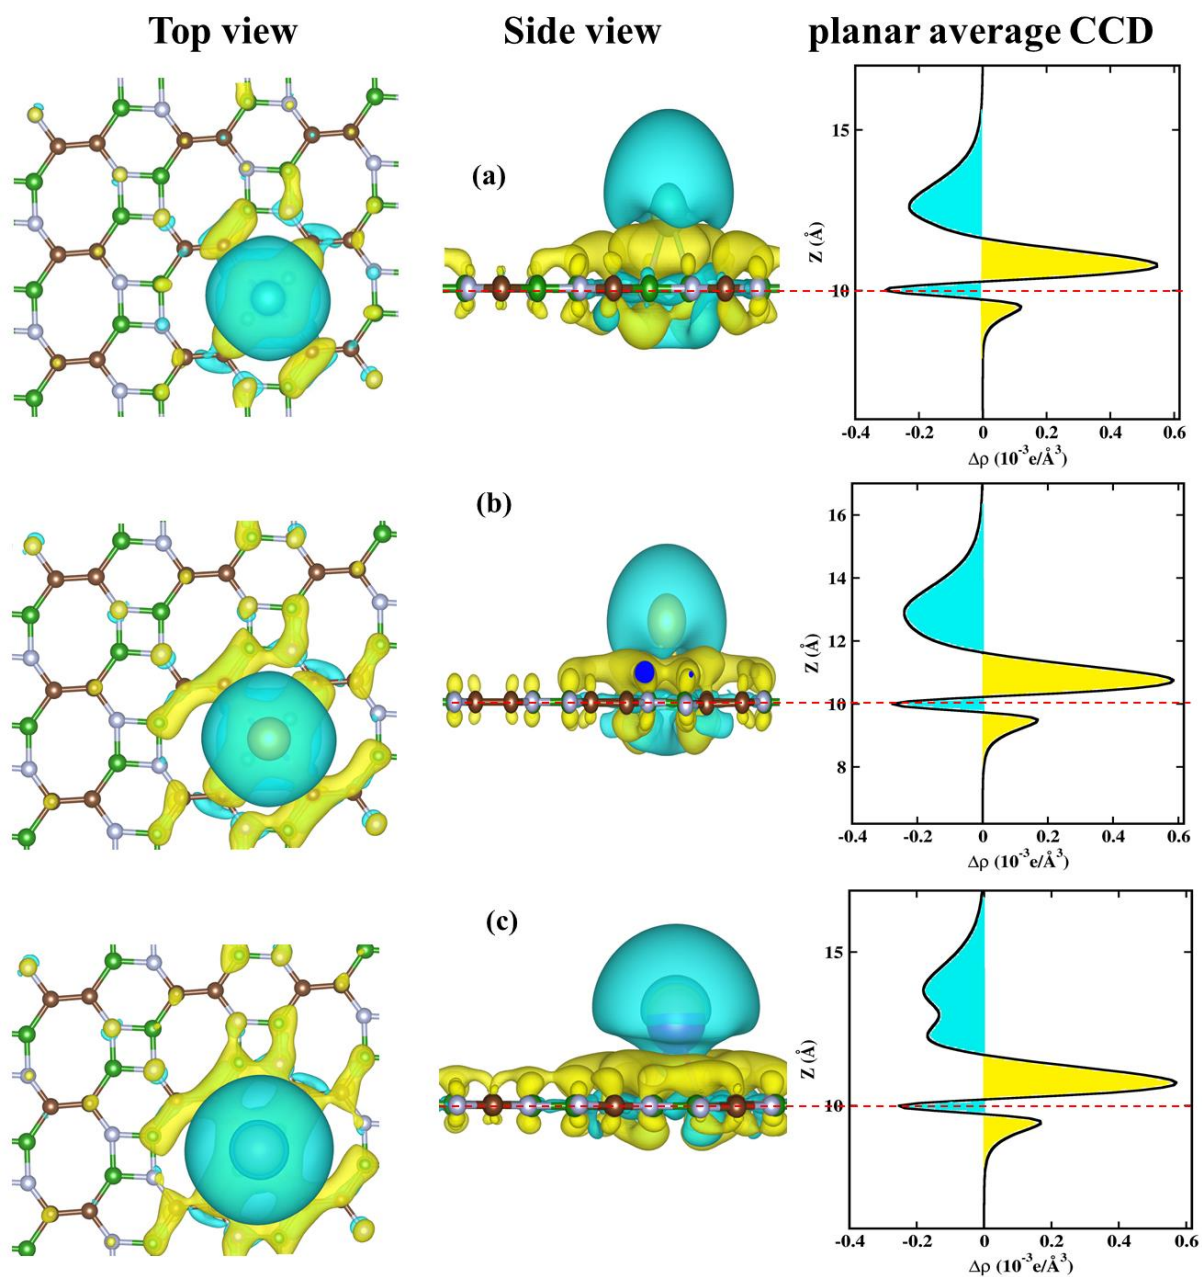

**Fig. S14** The top and side view along with average planar electron density difference for (a) Li- (b) Na- and K-metal adsorbed at (a) S-site on the bpn-BCN monolayer with iso-surface value of  $0.001 \text{ e}\text{\AA}^{-3}$ .
